# Supplementary material for: Analytical Sensitivity Analysis and Clinical Impact Modeling of Rapigen Rapid Diagnostic Tests for Malaria
Source: PubMed Central journal article supplement (PMC11542527; doi:10.4269/ajtmh.24-0003), 2024-09-03
Supplement: tpmd240003.SD1.pdf [file tpmd240003.SD1.pdf]

## Supplemental Materials

Table A. Proportion positive replicate tests at different dilutions of NIBSC 16/376 International standard for Pf antigen. Proportion positive of 5 or 40 replicates shown.

| Control ID                                                                | IU/mL of HRP2 and PfLDH | HRP2, pg/mL | PfLDH, pg/mL | Rapigen Pf(pLDH/HRPII) |            | Rapigen Pf/Pv | WHO comparator Pf(HRP2/PfLDH) |            | WHO comparator Pf/Pv |
|---------------------------------------------------------------------------|-------------------------|-------------|--------------|------------------------|------------|---------------|-------------------------------|------------|----------------------|
|                                                                           |                         |             |              | HRP2 line              | pfLDH line | pfLDH line    | HRP2 line                     | PfLDH line | HRP2 line            |
| 16/376                                                                    | 62.5                    | 4353        | 11661        | 1                      | 1          | 1             | 1                             | 1          | 1                    |
| 16/376                                                                    | 31.25                   | 1873        | 4760         | 1                      | 1          | 1             | 0.98                          | 0.73       | 1                    |
| 16/376                                                                    | 15.63                   | 1001        | 2702         | 1                      | 1          | 1             | 0.9                           | 0          | 1                    |
| 16/376                                                                    | 7.81                    | 566         | 1610         | 0.95*                  | 1          | 1             | 0                             | 0          | 0.78                 |
| 16/376                                                                    | 3.91                    | 295         | 902          | 1                      | 1          | 1             | 0                             | 0          | 0                    |
| 16/376                                                                    | 1.95                    | 146         | 433          | 0                      | 0          | 0.7           | 0                             | 0          | 0                    |
| 16/376                                                                    | 0.98                    | 76          | 205          | 0                      | 0          | 0             | 0                             | 0          | 0                    |
| 16/376                                                                    | 0.49                    | 35          | 94           | 0                      | 0          | 0             | 0                             | 0          | 0                    |
| *2 replicates had high background and test result couldn't be determined. |                         |             |              |                        |            |               |                               |            |                      |

Table B. Proportion positive replicate tests at different dilutions of NIBSC 19/116 International Standard for Pv antigen.

| Control | IU/mL | PvLDH, pg/mL | Proportion positive of 5 replicates |                      |
|---------|-------|--------------|-------------------------------------|----------------------|
|         |       |              | Rapigen Pf/Pv                       | WHO comparator Pf/Pv |
| 19/116  | 400   | 99553        | 1                                   | 1                    |
| 19/116  | 200   | 45480        | 1                                   | 1                    |
| 19/116  | 100   | 23196        | 1                                   | 1                    |
| 19/116  | 50    | 13506        | 1                                   | 1                    |
| 19/116  | 25    | 4122         | 1                                   | 0.6                  |
| 19/116  | 15    | 2534         | 1                                   | 0                    |
| 19/116  | 10    | 1807         | 1                                   | 0                    |
| 19/116  | 5     | 927          | 1                                   | 0                    |
| 19/116  | 2.5   | 484          | 0.6                                 | 0                    |
| 19/116  | 1     | 191          | 0.4                                 | 0                    |
| 19/116  | 0     | 0            | 0                                   | 0                    |
